# Supplementary material for: A CRISPR/Cas12a-coupled multiplexed amplification system for ultrasensitive detection of miRNA-155
Source: Royal Society of Chemistry journal article supplement (doi:10.1039/d5ay00415b), 2025-01-01
Supplement: d5ay00415b1.pdf [file d5ay00415b1.pdf]

CRISPR/Cas12a-coupled multiplexed amplification system for ultrasensitive  
detection of miRNA-155

Zhengdong Ai <sup>a†</sup>, Wenjun Wang <sup>a†</sup>, Xiang Li <sup>a</sup>, Xianfeng Wang <sup>b</sup>, Jia Chen <sup>c</sup>, Jianming  
Wu <sup>a,d\*</sup>, Shiying Zhou <sup>a\*</sup>.

<sup>a</sup> School of Basic Medical Sciences, Southwest Medical University, Luzhou 646000, P.  
R. China.

<sup>b</sup> Wuxi School of Medicine, Jiangnan University, Wuxi 214122, PR China.

<sup>c</sup> Sichuan Provincial Center for Mental Health, Sichuan Provincial People's Hospital,  
School of Medicine, University of Electronic Science and Technology of China,  
Chengdu, China.

<sup>d</sup> Key Laboratory of Medical Electrophysiology, Ministry of Education & Medical  
Electrophysiological Key Laboratory of Sichuan Province, (Collaborative Innovation  
Center for Prevention of Cardiovascular Diseases), Institute of Cardiovascular  
Research, Southwest Medical University, Luzhou 646000, China.

<sup>†</sup>Zhengdong Ai and Wenjun Wang contributed equally to this work.

\*Corresponding author. zhousy@swmu.edu.cn

## 20 Reagents and apparatus

21 All the oligonucleotides were synthesized by Sangon Biotech (Shanghai) Co.,  
 22 Ltd (Table S1). T4 DNA Ligase, Nb.BbvCI and Klenow Fragment were obtained from  
 23 New England Biolabs, Inc (Beijing). Cas12a (Cpf1) was provided by  
 24 Magigen Biotechnology (Guangzhou) Co., Ltd. CRISPR Cas12/13 HybriDetect strips  
 25 was purchased from Warbio (Nanjing). The ERA nucleic acid amplification kit was  
 26 purchased from GenDx Biotech (Suzhou) Co., Ltd. The relevant reagents of  
 27 polyacrylamide gel electrophoresis (PAGE) mainly included 5X TBE Buffer, 4S Green  
 28 Plus Nucleic Acid Stain, 30% Acryl/Bis Solution and ddH<sub>2</sub>O, which were provided by  
 29 Sangon Biotech (Shanghai) Co., Ltd. Tetramethylethylenediamine (TEMED) was  
 30 available from Macklin Biochemical (Shanghai) Co., Ltd. Reagents for real sample  
 31 detection experiments mainly included miRNA reverse transcription kit (Stem-loop  
 32 Method) and PCR Master Mix, which were also obtained from Sangon Biotech  
 33 (Shanghai) Co., Ltd. RNAsimple Total RNA Kit (DP419) was provided by TIANGEN  
 34 (Beijing).

35 Fluorescence experiment results were collected by fluorescence  
 36 spectrophotometer, (FL970, PerkinElmer). The experiment of polyacrylamide gel  
 37 electrophoresis (PAGE) was obtained by vertical electrophoresis apparatus (Mini-  
 38 PROTEAN, Bio-rad), and the result map was collected by a gel imager (UVsolo  
 39 Imager, JENA).

40 **Table S1 The DNA sequences used in this study**

| Name                    | Sequence (5'-3' direction)                                              |
|-------------------------|-------------------------------------------------------------------------|
| miRNA-155               | UUAAUGCUAAUCGUGAUAGGGGU                                                 |
| RPA template 1          | CATTGAGCTGCGGGAGCTGGCACCCGCTGGACCCCTA<br>TCAC                           |
| RPA template 2          | P-<br>GATTAGCATTAACTCAGCCGCGTGCAACCCACACG<br>GCAGCTGGTCCCTG             |
| PRA template 1<br>(PAM) | CATTGAGCTGCGGGAGCTGGCACCCGCTGGTTTACC<br>CCTATCAC                        |
| Forward primer          | CATTGAGCTGCGGGAGCTGGCACCCGCTGG                                          |
| Reverse primer          | CAGGGACCAGCTGCCGTGTGGGGTTGCACGCG                                        |
| crRNA template          | AATGCTAATCGTGATAGGGGATCTACACTTAGTAGAA<br>ATTA CCCTATAGTGAGTCGTATTAATTTC |
| T7 promoter             | GAAATTAATACGACTCACTATAGGG                                               |
| crRNA                   | UAAUUUCUACUAAGUGUAGAUCCCCUAUCACGAUU<br>AGCAUU                           |
| Cleavage reporter       | HEX-TATTATT-BHQ1                                                        |

|                                    |                                                        |
|------------------------------------|--------------------------------------------------------|
| (FQ-reporter)                      |                                                        |
| Bio-DNA-FAM                        | FAM-TTA TTA TT-Biotin                                  |
| miRNA-21                           | UAGCUUAUCAGACUGAUGUUGA                                 |
| Let 7a                             | UGAGGUAGUAGGUUGUAUAGUU                                 |
| Random RNA                         | UUGUACUACACAAAAGUACUG                                  |
| Stem-loop RT primer<br>(miRNA-155) | GTCGTATCCAGTGCAGGGTCCGAGGTATTCGCACTGG<br>ATACGACACCCCT |
| 155-Forward                        | GCGCTTAATGCTAATCGTGAT                                  |
| 155-Reverse                        | GTGCAGGGTCCGAGGT                                       |
| Stem-loop RT primer<br>(U6)        | GTCGTATCCAGTGCAGGGTCCGAGGTATTCGCACTG<br>GATACGACAAAATA |
| U6-Forward                         | CTCGCTTCG GCAGCACATA                                   |
| U6-Reverse                         | GTGCAGGGTCCGAGGT                                       |

---

41 “p” means the phosphate modification.

42

### 43 **Preparation of crRNA**

44 crRNA was synthesized by T7 transcription in vitro. Firstly, the mixture of 20  $\mu$ L  
45 containing T7 promoter (10  $\mu$ M), crRNA template (10  $\mu$ M) and RNase-free H<sub>2</sub>O were  
46 annealed at 95 °C for 5 min and cooled down to room temperature slowly. Then 10  $\mu$ L  
47 of NTP Mix (100 mM) and 1.5  $\mu$ L of T7 Mix were added, the transcription reaction  
48 was performed at 37°C overnight. Afterwards, 2  $\mu$ L of DNase I was added into the  
49 reaction liquid and maintained at 37 °C for 2 h to degrade the DNA template. Finally,  
50 the product was purified by a miRNA purification kit and quantified with a NanoDrop  
51 2000C (Thermo Fisher). And the obtained crRNA was characterized by gel  
52 electrophoresis analysis, Polyacrylamide gel were used for feasibility analysis  
53 experiments. The composition of polyacrylamide gel was shown in Table S3. After the  
54 reaction gel was prepared, mix the sample into loading buffer (6 $\times$ ) in a ratio of 5:1.  
55 After mixing evenly, 10  $\mu$ L mixture was added into the gel hole. Electrophoretic  
56 reaction was performed for 50 min at 110 V in 1 $\times$ TBE buffer. The 4S Red Plus nucleic  
57 acid staining solution was diluted 10,000 times with ddH<sub>2</sub>O to prepare the dye solution.  
58 The steps of crRNA synthesis was consistent with our previous work[22].

59

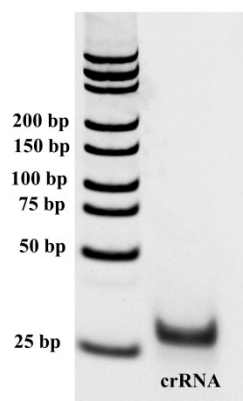

**Fig. S1** Gel electrophoresis analysis of crRNA

**Table S2** Comparison with other methods for miRNA detection.

| method                                | signal amplification                                                     | detection range | LOD (M)  | Ref.      |
|---------------------------------------|--------------------------------------------------------------------------|-----------------|----------|-----------|
| Electrochemistry                      | hydroquinone-mediated enzymatic reduction                                | 100 fM – 1 nM   | 22 fM    | [35]      |
| Electrochemistry                      | T7 exonuclease aided-digestion amplification                             | 50 fM - 500 pM  | 34.8 fM  | [36]      |
| Colorimetry                           | catalytic hairpin self-assembly reaction combined with gold nanoparticle | 0 pM - 5000 pM  | 20.7 pM  | [37]      |
| Colorimetry                           | CRISPR-Cas12a system combined with glucose oxidase (GOx) catalysis       | 50 fM - 50 pM   | 36.4 fM  | [38]      |
| Fiber-optic surface plasmon resonance | phenylboronic acid functionalized Au nanoparticles (PBA-AuNPs)           | 100 fM – 100 nM | 0.27 pM  | [39]      |
| Fluorescence                          | nicking-enhanced rolling circle amplification (SMB-NRCA).                | 1 pM - 6 nM     | 1 pM     | [40]      |
| Fluorescence                          | CRISPR-Cas12a coupled with strand displacement amplification             | 250 fM – 40 pM  | 150 fM   | [41]      |
| Fluorescence                          | CRISPR/Cas12a-coupled multiplexed amplification system                   | 200 fM to 1 nM  | 68.69 fM | this work |

63

**Table S3** Preparation of 10% non-denaturing polyacrylamide gel

| ingredient                    | volume ( mL ) |
|-------------------------------|---------------|
| Acryl/Bis 30% Solution (29:1) | 5 mL          |

|                    |        |
|--------------------|--------|
| 4×TBE buffer       | 3.5 mL |
| ddH <sub>2</sub> O | 6 mL   |
| APS (1 mg/mL)      | 150 µL |
| TEMED              | 10 µL  |

---

65

66
